# Supplementary material for: The Effects of Hydroalcoholic Extract of Silk Cocoon on Hypothalamic-Pituitary –Gonadal Axis in Streptozotocin-Induced Diabetic Male Rats
Source: Autoimmune Dis. 2022 Oct 19;2022:7916159. doi: 10.1155/2022/7916159 (PMC9605846; doi:10.1155/2022/7916159)
Supplement: Supplementary Materials — Variables of all study groups after STZ treatment on 29, 43 days are provided in supplementary table (S1). Histopathological changes in testicular tissue of different groups are provided as S2. [file 7916159.f1.zip]

Archive with 2 entries (2 files):
- S1.docx
- S2.doc
